# Supplementary material for: Characterization of the bark storage protein gene (JcBSP) family in the perennial woody plant Jatropha curcas and the function of JcBSP1 in Arabidopsis thaliana
Source: PeerJ. 2022 Feb 8;10:e12938. doi: 10.7717/peerj.12938 (PMC8833228; doi:10.7717/peerj.12938)
Supplement: Supplemental Information 3 [file peerj-10-12938-s003.xlsx]

## Sheet: Sheet1
Chart	Pairing	Sample Name	Targets	References	Mean Cp	Mean Cp	Target/Ref		Chart	Pairing	Sample Name	Targets	References	Mean Cp	Mean Cp	Target/Ref		BSP1-B+P
TRUE	D1/A1	Oct.	BSP1-1B+P	ACT1-1B+P	11.6374	18.6945	133.2		TRUE	D7/A7	Oct.	BSP1-1X+P	ACT1-1X+P	11.3286	16.81	44.68		Oct.	146.033	18.2907
TRUE	D2/A2	Dec.	BSP1-1B+P	ACT1-1B+P	12.6711	19.7896	139		TRUE	D8/A8	Dec.	BSP1-1X+P	ACT1-1X+P	12.414	21.808	672.8		Dec.	121.977	25.43
TRUE	D3/A3	Mar.	BSP1-1B+P	ACT1-1B+P	14.5734	16.6257	4.148		TRUE	D9/A9	Mar.	BSP1-1X+P	ACT1-1X+P	11.8399	14.3433	5.67		Mar.	3.99067	0.147708
TRUE	D4/A4	Apr.	BSP1-1B+P	ACT1-1B+P	13.8935	18.6054	26.21		TRUE	D10/A10	Apr.	BSP1-1X+P	ACT1-1X+P	13.6033	17.9052	19.72		Apr.	24.9267	6.2431
TRUE	D5/A5	Jun.	BSP1-1B+P	ACT1-1B+P	13.8028	18.2159	21.31		TRUE	D11/A11	Jun.	BSP1-1X+P	ACT1-1X+P	12.8004	17.3501	23.42		Jun.	23.7733	4.57786
TRUE	D6/A6	Aug.	BSP1-1B+P	ACT1-1B+P	12.6682	16.879	18.52		TRUE	D12/A12	Aug.	BSP1-1X+P	ACT1-1X+P	13.9218	16.51	6.014		Aug.	32.62	17.4166
Chart	Pairing	Sample Name	Targets	References	Mean Cp	Mean Cp	Target/Ref		Chart	Pairing	Sample Name	Targets	References	Mean Cp	Mean Cp	Target/Ref		BSP1-X+P
TRUE	D1/A1	Oct.	BSP1-2B+P	ACT1-2B+P	12.4644	19.5202	133		TRUE	D7/A7	Oct.	BSP1-2X+P	ACT1-2X+P	11.8707	16.479	24.39		Oct.	46.4833	18.8186
TRUE	D2/A2	Dec.	BSP1-2B+P	ACT1-2B+P	13.6877	20.8258	140.9		TRUE	D8/A8	Dec.	BSP1-2X+P	ACT1-2X+P	13.2523	20.8601	195.1		Dec.	478.6	204.988
TRUE	D3/A3	Mar.	BSP1-2B+P	ACT1-2B+P	14.8916	16.9029	4.031		TRUE	D9/A9	Mar.	BSP1-2X+P	ACT1-2X+P	12.653	13.5737	1.893		Mar.	4.108	1.6096
TRUE	D4/A4	Apr.	BSP1-2B+P	ACT1-2B+P	14.7063	18.7696	16.72		TRUE	D10/A10	Apr.	BSP1-2X+P	ACT1-2X+P	14.3606	17.5943	9.407		Apr.	27.899	19.3235
TRUE	D5/A5	Jun.	BSP1-2B+P	ACT1-2B+P	14.4415	18.7504	19.82		TRUE	D11/A11	Jun.	BSP1-2X+P	ACT1-2X+P	13.6355	16.6535	8.101		Jun.	25.5703	15.2177
TRUE	D6/A6	Aug.	BSP1-2B+P	ACT1-2B+P	12.9789	17.4501	22.18		TRUE	D12/A12	Aug.	BSP1-2X+P	ACT1-2X+P	14.3941	15.6928	2.46		Aug.	5.486	2.28586
Chart	Pairing	Sample Name	Targets	References	Mean Cp	Mean Cp	Target/Ref		Chart	Pairing	Sample Name	Targets	References	Mean Cp	Mean Cp	Target/Ref
TRUE	D1/A1	Oct.	BSP1-3B+P	ACT1-3B+P	13.934	21.3593	171.9		TRUE	D7/A7	Oct.	BSP1-3X+P	ACT1-3X+P	12.6839	18.821	70.38
TRUE	D2/A2	Dec.	BSP1-3B+P	ACT1-3B+P	15.3528	21.7796	86.03		TRUE	D8/A8	Dec.	BSP1-3X+P	ACT1-3X+P	13.3908	22.5402	567.9
TRUE	D3/A3	Mar.	BSP1-3B+P	ACT1-3B+P	16.6475	18.5706	3.793		TRUE	D9/A9	Mar.	BSP1-3X+P	ACT1-3X+P	13.7139	15.9651	4.761
TRUE	D4/A4	Apr.	BSP1-3B+P	ACT1-3B+P	15.7984	20.7919	31.85		TRUE	D10/A10	Apr.	BSP1-3X+P	ACT1-3X+P	15.8966	21.6666	54.57
TRUE	D5/A5	Jun.	BSP1-3B+P	ACT1-3B+P	16.556	21.4718	30.19		TRUE	D11/A11	Jun.	BSP1-3X+P	ACT1-3X+P	15.3919	20.89	45.19
TRUE	D6/A6	Aug.	BSP1-3B+P	ACT1-3B+P	14.8987	20.7357	57.16		TRUE	D12/A12	Aug.	BSP1-3X+P	ACT1-3X+P	15.7808	18.7779	7.984
Chart	Pairing	Sample Name	Targets	References	Mean Cp	Mean Cp	Target/Ref		Chart	Pairing	Sample Name	Targets	References	Mean Cp	Mean Cp	Target/Ref		BSP2-B+P
TRUE	D1/A1	Oct.	BSP2-1B+P	ACT2-1B+P	26.7542	18.9042	0.00433		TRUE	D7/A7	Oct.	BSP2-1X+P	ACT2-1X+P	33.8495	16.4607	5.83e-06		Oct.	0.00515667	0.00112692
TRUE	D2/A2	Dec.	BSP2-1B+P	ACT2-1B+P	29.9352	20.8396	0.00183		TRUE	D8/A8	Dec.	BSP2-1X+P	ACT2-1X+P	38.8894	20.594	3.11e-06		Dec.	0.00109933	0.0006052
TRUE	D3/A3	Mar.	BSP2-1B+P	ACT2-1B+P	25.334	14.6507	0.000608		TRUE	D9/A9	Mar.	BSP2-1X+P	ACT2-1X+P	33.7141	12.6662	4.61e-07		Mar.	0.000353667	0.00018271
TRUE	D4/A4	Apr.	BSP2-1B+P	ACT2-1B+P	26.7092	17.658	0.00189		TRUE	D10/A10	Apr.	BSP2-1X+P	ACT2-1X+P	37.5392	17.8522	1.18e-06		Apr.	0.001481	0.000635821
TRUE	D5/A5	Jun.	BSP2-1B+P	ACT2-1B+P	26.9428	18.9089	0.00382		TRUE	D11/A11	Jun.	BSP2-1X+P	ACT2-1X+P	33.737	16.6182	7.03e-06		Jun.	0.00312	0.000997029
TRUE	D6/A6	Aug.	BSP2-1B+P	ACT2-1B+P	26.3999	15.6045	0.000563		TRUE	D12/A12	Aug.	BSP2-1X+P	ACT2-1X+P	38.657	17.6996	4.91e-07		Aug.	0.000798667	0.000340379
Chart	Pairing	Sample Name	Targets	References	Mean Cp	Mean Cp	Target/Ref		Chart	Pairing	Sample Name	Targets	References	Mean Cp	Mean Cp	Target/Ref		BSP2-X+P
TRUE	D1/A1	Oct.	BSP2-2B+P	ACT2-2B+P	28.6167	21.4055	0.00675		TRUE	D7/A7	Oct.	BSP2-2X+P	ACT2-2X+P	33.8544	16.5614	6.23e-06		Oct.	4.65e-06	1.95843e-06
TRUE	D2/A2	Dec.	BSP2-2B+P	ACT2-2B+P	32.1243	22.3262	0.00112		TRUE	D8/A8	Dec.	BSP2-2X+P	ACT2-2X+P	36.4235	18.3615	3.65e-06		Dec.	2.58667e-06	1.1434e-06
TRUE	D3/A3	Mar.	BSP2-2B+P	ACT2-2B+P	29.6069	17.733	0.000266		TRUE	D9/A9	Mar.	BSP2-2X+P	ACT2-2X+P	32.5029	10.2405	1.99e-07		Mar.	2.81667e-07	1.26937e-07
TRUE	D4/A4	Apr.	BSP2-2B+P	ACT2-2B+P	28.3303	19.3426	0.00197		TRUE	D10/A10	Apr.	BSP2-2X+P	ACT2-2X+P	37.0326	16.0884	4.96e-07		Apr.	7.40667e-07	3.11325e-07
TRUE	D5/A5	Jun.	BSP2-2B+P	ACT2-2B+P	28.8136	20.7863	0.00383		TRUE	D11/A11	Jun.	BSP2-2X+P	ACT2-2X+P	33.2439	15.6395	5.02e-06		Jun.	4.37e-06	2.4802e-06
TRUE	D6/A6	Aug.	BSP2-2B+P	ACT2-2B+P	28.2883	18.6745	0.00128		TRUE	D12/A12	Aug.	BSP2-2X+P	ACT2-2X+P	40.2729	17.3676	1.27e-07		Aug.	2.217e-07	1.93197e-07
Chart	Pairing	Sample Name	Targets	References	Mean Cp	Mean Cp	Target/Ref		Chart	Pairing	Sample Name	Targets	References	Mean Cp	Mean Cp	Target/Ref
TRUE	D1/A1	Oct.	BSP2-3B+P	ACT2-3B+P	24.7182	16.8872	0.00439		TRUE	D7/A7	Oct.	BSP2-3X+P	ACT2-3X+P	35.6384	16.6284	1.89e-06
TRUE	D2/A2	Dec.	BSP2-3B+P	ACT2-3B+P	30.3868	18.8965	0.000348		TRUE	D8/A8	Dec.	BSP2-3X+P	ACT2-3X+P	39.8134	19.8853	1e-06
TRUE	D3/A3	Mar.	BSP2-3B+P	ACT2-3B+P	28.752	16.3683	0.000187		TRUE	D9/A9	Mar.	BSP2-3X+P	ACT2-3X+P	37.735	15.3683	1.85e-07
TRUE	D4/A4	Apr.	BSP2-3B+P	ACT2-3B+P	29.3889	18.6453	0.000583		TRUE	D10/A10	Apr.	BSP2-3X+P	ACT2-3X+P	39.4024	18.597	5.46e-07
TRUE	D5/A5	Jun.	BSP2-3B+P	ACT2-3B+P	27.8004	18.6103	0.00171		TRUE	D11/A11	Jun.	BSP2-3X+P	ACT2-3X+P	37.2494	17.3962	1.06e-06
TRUE	D6/A6	Aug.	BSP2-3B+P	ACT2-3B+P	27.468	16.6472	0.000553		TRUE	D12/A12	Aug.	BSP2-3X+P	ACT2-3X+P	40.9815	16.643	4.71e-08
Chart	Pairing	Sample Name	Targets	References	Mean Cp	Mean Cp	Target/Ref		Chart	Pairing	Sample Name	Targets	References	Mean Cp	Mean Cp	Target/Ref		BSP3-B+P
TRUE	D1/A1	Oct.	BSP3-1B+P	ACT3-1B+P	28.7417	18.4662	0.000807		TRUE	D7/A7	Oct.	BSP3-1X+P	ACT3-1X+P	28.4698	15.6939	0.000143		Oct.	0.000445333	0.000256232
TRUE	D2/A2	Dec.	BSP3-1B+P	ACT3-1B+P	29.6557	18.9142	0.000584		TRUE	D8/A8	Dec.	BSP3-1X+P	ACT3-1X+P	28.661	18.5677	0.000915		Dec.	0.0008	0.000207487
TRUE	D3/A3	Mar.	BSP3-1B+P	ACT3-1B+P	27.8139	16.472	0.000385		TRUE	D9/A9	Mar.	BSP3-1X+P	ACT3-1X+P	29.8776	14.392	2.18e-05		Mar.	0.000438333	6.24731e-05
TRUE	D4/A4	Apr.	BSP3-1B+P	ACT3-1B+P	29.6866	18.5652	0.000449		TRUE	D10/A10	Apr.	BSP3-1X+P	ACT3-1X+P	30.6592	17.6775	0.000124		Apr.	0.000389	0.000196511
TRUE	D5/A5	Jun.	BSP3-1B+P	ACT3-1B+P	28.5562	18.7477	0.00112		TRUE	D11/A11	Jun.	BSP3-1X+P	ACT3-1X+P	30.3983	16.4977	6.54e-05		Jun.	0.00113267	0.000156208
TRUE	D6/A6	Aug.	BSP3-1B+P	ACT3-1B+P	28.0646	16.994	0.000465		TRUE	D12/A12	Aug.	BSP3-1X+P	ACT3-1X+P	30.5804	15.8699	3.73e-05		Aug.	0.000619333	0.000200157
Chart	Pairing	Sample Name	Targets	References	Mean Cp	Mean Cp	Target/Ref		Chart	Pairing	Sample Name	Targets	References	Mean Cp	Mean Cp	Target/Ref		BSP3-X+P
TRUE	D1/A1	Oct.	BSP3-2B+P	ACT3-2B+P	31.7902	19.7964	0.000245		TRUE	D7/A7	Oct.	BSP3-2X+P	ACT3-2X+P	27.7151	15.6565	0.000234		Oct.	0.000196667	3.89044e-05
TRUE	D2/A2	Dec.	BSP3-2B+P	ACT3-2B+P	27.6694	17.8137	0.00108		TRUE	D8/A8	Dec.	BSP3-2X+P	ACT3-2X+P	29.5825	18.6413	0.000509		Dec.	0.000648667	0.000188401
TRUE	D3/A3	Mar.	BSP3-2B+P	ACT3-2B+P	26.1074	14.835	0.000404		TRUE	D9/A9	Mar.	BSP3-2X+P	ACT3-2X+P	30.3296	14.3676	1.57e-05		Mar.	2.04e-05	3.41272e-06
TRUE	D4/A4	Apr.	BSP3-2B+P	ACT3-2B+P	29.709	16.7357	0.000124		TRUE	D10/A10	Apr.	BSP3-2X+P	ACT3-2X+P	32.2587	17.648	4e-05		Apr.	6.52e-05	4.17191e-05
TRUE	D5/A5	Jun.	BSP3-2B+P	ACT3-2B+P	26.6436	16.6015	0.000948		TRUE	D11/A11	Jun.	BSP3-2X+P	ACT3-2X+P	29.4325	15.7139	7.42e-05		Jun.	6.55e-05	7.06305e-06
TRUE	D6/A6	Aug.	BSP3-2B+P	ACT3-2B+P	24.4148	14.3007	0.000902		TRUE	D12/A12	Aug.	BSP3-2X+P	ACT3-2X+P	30.6381	15.5556	2.88e-05		Aug.	3.48667e-05	4.31766e-06
Chart	Pairing	Sample Name	Targets	References	Mean Cp	Mean Cp	Target/Ref		Chart	Pairing	Sample Name	Targets	References	Mean Cp	Mean Cp	Target/Ref
TRUE	D1/A1	Oct.	BSP3-3B+P	ACT3-3B+P	32.4229	20.6398	0.000284		TRUE	D7/A7	Oct.	BSP3-3X+P	ACT3-3X+P	26.7565	14.5601	0.000213
TRUE	D2/A2	Dec.	BSP3-3B+P	ACT3-3B+P	26.8719	16.4643	0.000736		TRUE	D8/A8	Dec.	BSP3-3X+P	ACT3-3X+P	28.53	17.627	0.000522
TRUE	D3/A3	Mar.	BSP3-3B+P	ACT3-3B+P	23.982	13.0886	0.000526		TRUE	D9/A9	Mar.	BSP3-3X+P	ACT3-3X+P	28.8231	13.4557	2.37e-05
TRUE	D4/A4	Apr.	BSP3-3B+P	ACT3-3B+P	26.9756	16.2581	0.000594		TRUE	D10/A10	Apr.	BSP3-3X+P	ACT3-3X+P	31.6335	16.6817	3.16e-05
TRUE	D5/A5	Jun.	BSP3-3B+P	ACT3-3B+P	24.9502	15.3942	0.00133		TRUE	D11/A11	Jun.	BSP3-3X+P	ACT3-3X+P	29.6155	15.5148	5.69e-05
TRUE	D6/A6	Aug.	BSP3-3B+P	ACT3-3B+P	20.3537	9.36054	0.000491		TRUE	D12/A12	Aug.	BSP3-3X+P	ACT3-3X+P	29.3737	14.7095	3.85e-05
Chart	Pairing	Sample Name	Targets	References	Mean Cp	Mean Cp	Target/Ref		Chart	Pairing	Sample Name	Targets	References	Mean Cp	Mean Cp	Target/Ref		BSP4-B+P
TRUE	D1/A1	Oct.	BSP4-1B+P	ACT4-1B+P	25.7342	21.8768	0.069		TRUE	D7/A7	Oct.	BSP4-1X+P	ACT4-1X+P	20.8112	16.6427	0.0556		Oct.	0.0521667	0.0147409
TRUE	D2/A2	Dec.	BSP4-1B+P	ACT4-1B+P	29.76	21.6735	0.00368		TRUE	D8/A8	Dec.	BSP4-1X+P	ACT4-1X+P	25.8894	20.5733	0.0251		Dec.	0.00192	0.00124453
TRUE	D3/A3	Mar.	BSP4-1B+P	ACT4-1B+P	21.6728	16.6546	0.0309		TRUE	D9/A9	Mar.	BSP4-1X+P	ACT4-1X+P	22.5829	15.3376	0.00659		Mar.	0.0195133	0.00921132
TRUE	D4/A4	Apr.	BSP4-1B+P	ACT4-1B+P	24.7949	20.9195	0.0681		TRUE	D10/A10	Apr.	BSP4-1X+P	ACT4-1X+P	26.4515	18.9335	0.00546		Apr.	0.0351	0.0233808
TRUE	D5/A5	Jun.	BSP4-1B+P	ACT4-1B+P	25.2324	19.9161	0.0251		TRUE	D11/A11	Jun.	BSP4-1X+P	ACT4-1X+P	22.1543	16.7981	0.0244		Jun.	0.0202667	0.00448132
TRUE	D6/A6	Aug.	BSP4-1B+P	ACT4-1B+P	24.3092	18.6185	0.0194		TRUE	D12/A12	Aug.	BSP4-1X+P	ACT4-1X+P	25.5867	17.9032	0.00486		Aug.	0.0171	0.00645446
Chart	Pairing	Sample Name	Targets	References	Mean Cp	Mean Cp	Target/Ref		Chart	Pairing	Sample Name	Targets	References	Mean Cp	Mean Cp	Target/Ref		BSP4-X+P
TRUE	D1/A1	Oct.	BSP4-2B+P	ACT4-2B+P	25.7599	21.559	0.0544		TRUE	D7/A7	Oct.	BSP4-2X+P	ACT4-2X+P	25.3879	19.7528	0.0201		Oct.	0.0354667	0.0148796
TRUE	D2/A2	Dec.	BSP4-2B+P	ACT4-2B+P	32.7725	22.8794	0.00105		TRUE	D8/A8	Dec.	BSP4-2X+P	ACT4-2X+P	28.7098	22.3908	0.0125		Dec.	0.0166333	0.00598739
TRUE	D3/A3	Mar.	BSP4-2B+P	ACT4-2B+P	26.2716	20.577	0.0193		TRUE	D9/A9	Mar.	BSP4-2X+P	ACT4-2X+P	24.4052	15.6561	0.00232		Mar.	0.00412	0.00180645
TRUE	D4/A4	Apr.	BSP4-2B+P	ACT4-2B+P	27.6528	21.7594	0.0168		TRUE	D10/A10	Apr.	BSP4-2X+P	ACT4-2X+P	28.7335	21.6115	0.00718		Apr.	0.00666	0.000851039
TRUE	D5/A5	Jun.	BSP4-2B+P	ACT4-2B+P	27.8335	22.2861	0.0214		TRUE	D11/A11	Jun.	BSP4-2X+P	ACT4-2X+P	25.495	20.4986	0.0313		Jun.	0.0248333	0.00511229
TRUE	D6/A6	Aug.	BSP4-2B+P	ACT4-2B+P	26.7406	21.3349	0.0236		TRUE	D12/A12	Aug.	BSP4-2X+P	ACT4-2X+P	27.553	19.7544	0.00449		Aug.	0.00431667	0.000528793
Chart	Pairing	Sample Name	Targets	References	Mean Cp	Mean Cp	Target/Ref		Chart	Pairing	Sample Name	Targets	References	Mean Cp	Mean Cp	Target/Ref
TRUE	D1/A1	Oct.	BSP4-3B+P	ACT4-3B+P	26.7293	21.8144	0.0331		TRUE	D7/A7	Oct.	BSP4-3X+P	ACT4-3X+P	24.564	19.5402	0.0307
TRUE	D2/A2	Dec.	BSP4-3B+P	ACT4-3B+P	32.8124	22.8861	0.00103		TRUE	D8/A8	Dec.	BSP4-3X+P	ACT4-3X+P	28.8096	22.4676	0.0123
TRUE	D3/A3	Mar.	BSP4-3B+P	ACT4-3B+P	26.5849	19.6792	0.00834		TRUE	D9/A9	Mar.	BSP4-3X+P	ACT4-3X+P	23.6805	15.4993	0.00345
TRUE	D4/A4	Apr.	BSP4-3B+P	ACT4-3B+P	27.5892	21.972	0.0204		TRUE	D10/A10	Apr.	BSP4-3X+P	ACT4-3X+P	28.7618	21.6713	0.00734
TRUE	D5/A5	Jun.	BSP4-3B+P	ACT4-3B+P	28.5396	22.4152	0.0143		TRUE	D11/A11	Jun.	BSP4-3X+P	ACT4-3X+P	25.5922	19.856	0.0188
TRUE	D6/A6	Aug.	BSP4-3B+P	ACT4-3B+P	27.6328	20.7193	0.0083		TRUE	D12/A12	Aug.	BSP4-3X+P	ACT4-3X+P	26.8197	18.7003	0.0036
Chart	Pairing	Sample Name	Targets	References	Mean Cp	Mean Cp	Target/Ref		Chart	Pairing	Sample Name	Targets	References	Mean Cp	Mean Cp	Target/Ref		BSP5-B+P
TRUE	D1/A1	Oct.	BSP5-1B+P	ACT5-1B+P	26.3509	21.7399	0.0409		TRUE	D7/A7	Oct.	BSP5-1X+P	ACT5-1X+P	24.5051	16.4221	0.00369		Oct.	0.0407	0.00408493
TRUE	D2/A2	Dec.	BSP5-1B+P	ACT5-1B+P	25.2147	20.9209	0.051		TRUE	D8/A8	Dec.	BSP5-1X+P	ACT5-1X+P	25.5504	19.5344	0.0155		Dec.	0.0382	0.00918296
TRUE	D3/A3	Mar.	BSP5-1B+P	ACT5-1B+P	19.0978	15.7337	0.0971		TRUE	D9/A9	Mar.	BSP5-1X+P	ACT5-1X+P	18.8748	14.4041	0.0451		Mar.	0.0683667	0.0251239
TRUE	D4/A4	Apr.	BSP5-1B+P	ACT5-1B+P	24.6584	20.3441	0.0503		TRUE	D10/A10	Apr.	BSP5-1X+P	ACT5-1X+P	24.887	17.8151	0.00743		Apr.	0.0668	0.0117986
TRUE	D5/A5	Jun.	BSP5-1B+P	ACT5-1B+P	23.6228	18.4641	0.028		TRUE	D11/A11	Jun.	BSP5-1X+P	ACT5-1X+P	23.8391	16.5639	0.00646		Jun.	0.0249333	0.00821151
TRUE	D6/A6	Aug.	BSP5-1B+P	ACT5-1B+P	22.6366	17.3911	0.0264		TRUE	D12/A12	Aug.	BSP5-1X+P	ACT5-1X+P	26.4079	19.7356	0.00981		Aug.	0.0193433	0.00745581
Chart	Pairing	Sample Name	Targets	References	Mean Cp	Mean Cp	Target/Ref		Chart	Pairing	Sample Name	Targets	References	Mean Cp	Mean Cp	Target/Ref		BSP5-X+P
TRUE	D1/A1	Oct.	BSP5-2B+P	ACT5-2B+P	26.6776	21.8647	0.0356		TRUE	D7/A7	Oct.	BSP5-2X+P	ACT5-2X+P	23.6761	16.3936	0.00642		Oct.	0.00451	0.00135506
TRUE	D2/A2	Dec.	BSP5-2B+P	ACT5-2B+P	26.7068	21.6435	0.0299		TRUE	D8/A8	Dec.	BSP5-2X+P	ACT5-2X+P	25.58	19.71	0.0171		Dec.	0.0144667	0.00267374
TRUE	D3/A3	Mar.	BSP5-2B+P	ACT5-2B+P	19.6734	14.8735	0.0359		TRUE	D9/A9	Mar.	BSP5-2X+P	ACT5-2X+P	18.5401	13.7714	0.0367		Mar.	0.0362667	0.00739564
TRUE	D4/A4	Apr.	BSP5-2B+P	ACT5-2B+P	26.5122	22.7338	0.0729		TRUE	D10/A10	Apr.	BSP5-2X+P	ACT5-2X+P	24.649	17.791	0.00862		Apr.	0.00749333	0.000895185
TRUE	D5/A5	Jun.	BSP5-2B+P	ACT5-2B+P	23.8692	17.6837	0.0137		TRUE	D11/A11	Jun.	BSP5-2X+P	ACT5-2X+P	25.4449	19.659	0.0181		Jun.	0.01017	0.00561122
TRUE	D6/A6	Aug.	BSP5-2B+P	ACT5-2B+P	24.5678	17.7765	0.00903		TRUE	D12/A12	Aug.	BSP5-2X+P	ACT5-2X+P	27.3331	20.7998	0.0108		Aug.	0.00943333	0.00129729
Chart	Pairing	Sample Name	Targets	References	Mean Cp	Mean Cp	Target/Ref		Chart	Pairing	Sample Name	Targets	References	Mean Cp	Mean Cp	Target/Ref
TRUE	D1/A1	Oct.	BSP5-3B+P	ACT5-3B+P	26.7282	22.2725	0.0456		TRUE	D7/A7	Oct.	BSP5-3X+P	ACT5-3X+P	25.7285	17.5368	0.00342
TRUE	D2/A2	Dec.	BSP5-3B+P	ACT5-3B+P	27.4883	22.5978	0.0337		TRUE	D8/A8	Dec.	BSP5-3X+P	ACT5-3X+P	27.2655	20.7317	0.0108
TRUE	D3/A3	Mar.	BSP5-3B+P	ACT5-3B+P	19.8387	16.0446	0.0721		TRUE	D9/A9	Mar.	BSP5-3X+P	ACT5-3X+P	19.7931	14.5805	0.027
TRUE	D4/A4	Apr.	BSP5-3B+P	ACT5-3B+P	26.612	22.9159	0.0772		TRUE	D10/A10	Apr.	BSP5-3X+P	ACT5-3X+P	26.7648	19.483	0.00643
TRUE	D5/A5	Jun.	BSP5-3B+P	ACT5-3B+P	23.6351	18.7191	0.0331		TRUE	D11/A11	Jun.	BSP5-3X+P	ACT5-3X+P	27.804	20.4122	0.00595
TRUE	D6/A6	Aug.	BSP5-3B+P	ACT5-3B+P	25.5167	20.0484	0.0226		TRUE	D12/A12	Aug.	BSP5-3X+P	ACT5-3X+P	26.4781	19.4544	0.00769
Chart	Pairing	Sample Name	Targets	References	Mean Cp	Mean Cp	Target/Ref		Chart	Pairing	Sample Name	Targets	References	Mean Cp	Mean Cp	Target/Ref		BSP6-B+P
TRUE	D1/A1	Oct.	BSP6-1B+P	ACT6-1B+P	30.7793	21.441	0.00154		TRUE	D7/A7	Oct.	BSP6-1X+P	ACT6-1X+P	29.0531	18.6225	0.000725		Oct.	0.00192667	0.000504997
TRUE	D2/A2	Dec.	BSP6-1B+P	ACT6-1B+P	32.4113	23.1073	0.00158		TRUE	D8/A8	Dec.	BSP6-1X+P	ACT6-1X+P	31.4761	21.914	0.00132		Dec.	0.00171333	0.000371424
TRUE	D3/A3	Mar.	BSP6-1B+P	ACT6-1B+P	26.592	16.8541	0.00117		TRUE	D9/A9	Mar.	BSP6-1X+P	ACT6-1X+P	25.6302	14.5695	0.000468		Mar.	0.000682667	0.000345525
TRUE	D4/A4	Apr.	BSP6-1B+P	ACT6-1B+P	27.6175	18.4021	0.00168		TRUE	D10/A10	Apr.	BSP6-1X+P	ACT6-1X+P	34.6296	20.4888	5.54e-05		Apr.	0.00145667	0.000308797
TRUE	D5/A5	Jun.	BSP6-1B+P	ACT6-1B+P	28.9065	19.7791	0.00179		TRUE	D11/A11	Jun.	BSP6-1X+P	ACT6-1X+P	29.9502	18.8068	0.000442		Jun.	0.00104133	0.000595128
TRUE	D6/A6	Aug.	BSP6-1B+P	ACT6-1B+P	29.8157	20.6156	0.0017		TRUE	D12/A12	Aug.	BSP6-1X+P	ACT6-1X+P	29.3005	17.4342	0.000268		Aug.	0.00232333	0.00105579
Chart	Pairing	Sample Name	Targets	References	Mean Cp	Mean Cp	Target/Ref		Chart	Pairing	Sample Name	Targets	References	Mean Cp	Mean Cp	Target/Ref		BSP6-X+P
TRUE	D1/A1	Oct.	BSP6-2B+P	ACT6-2B+P	31.5943	22.3056	0.0016		TRUE	D7/A7	Oct.	BSP6-2X+P	ACT6-2X+P	29.8038	20.0936	0.00119		Oct.	0.000861333	0.000233524
TRUE	D2/A2	Dec.	BSP6-2B+P	ACT6-2B+P	33.0646	23.5167	0.00134		TRUE	D8/A8	Dec.	BSP6-2X+P	ACT6-2X+P	30.4961	22.2043	0.00319		Dec.	0.00191667	0.000900975
TRUE	D3/A3	Mar.	BSP6-2B+P	ACT6-2B+P	31.4279	20.3733	0.00047		TRUE	D9/A9	Mar.	BSP6-2X+P	ACT6-2X+P	24.6439	13.7644	0.000531		Mar.	0.000379333	0.000171877
TRUE	D4/A4	Apr.	BSP6-2B+P	ACT6-2B+P	27.514	18.2911	0.00167		TRUE	D10/A10	Apr.	BSP6-2X+P	ACT6-2X+P	32.1505	21.4945	0.00062		Apr.	0.000235367	0.000272164
TRUE	D5/A5	Jun.	BSP6-2B+P	ACT6-2B+P	32.4401	22.474	0.001		TRUE	D11/A11	Jun.	BSP6-2X+P	ACT6-2X+P	29.079	18.0695	0.000485		Jun.	0.000426667	5.49687e-05
TRUE	D6/A6	Aug.	BSP6-2B+P	ACT6-2B+P	30.0464	20.6257	0.00146		TRUE	D12/A12	Aug.	BSP6-2X+P	ACT6-2X+P	34.2014	17.6458	1.04e-05		Aug.	0.000124033	0.00010733
Chart	Pairing	Sample Name	Targets	References	Mean Cp	Mean Cp	Target/Ref		Chart	Pairing	Sample Name	Targets	References	Mean Cp	Mean Cp	Target/Ref
TRUE	D1/A1	Oct.	BSP6-3B+P	ACT6-3B+P	30.6794	22.1141	0.00264		TRUE	D7/A7	Oct.	BSP6-3X+P	ACT6-3X+P	28.4097	17.8633	0.000669
TRUE	D2/A2	Dec.	BSP6-3B+P	ACT6-3B+P	31.348	22.5296	0.00222		TRUE	D8/A8	Dec.	BSP6-3X+P	ACT6-3X+P	32.1072	22.4566	0.00124
TRUE	D3/A3	Mar.	BSP6-3B+P	ACT6-3B+P	30.8087	19.5495	0.000408		TRUE	D9/A9	Mar.	BSP6-3X+P	ACT6-3X+P	26.6411	13.832	0.000139
TRUE	D4/A4	Apr.	BSP6-3B+P	ACT6-3B+P	27.6992	17.7574	0.00102		TRUE	D10/A10	Apr.	BSP6-3X+P	ACT6-3X+P	36.5458	21.5536	3.07e-05
TRUE	D5/A5	Jun.	BSP6-3B+P	ACT6-3B+P	33.6531	22.1039	0.000334		TRUE	D11/A11	Jun.	BSP6-3X+P	ACT6-3X+P	30.1188	18.6525	0.000353
TRUE	D6/A6	Aug.	BSP6-3B+P	ACT6-3B+P	28.606	20.5695	0.00381		TRUE	D12/A12	Aug.	BSP6-3X+P	ACT6-3X+P	31.0724	17.6909	9.37e-05
