# Supplementary material for: Characterization of the bark storage protein gene (JcBSP) family in the perennial woody plant Jatropha curcas and the function of JcBSP1 in Arabidopsis thaliana
Source: PeerJ. 2022 Feb 8;10:e12938. doi: 10.7717/peerj.12938 (PMC8833228; doi:10.7717/peerj.12938)
Supplement: Supplemental Information 4 [file peerj-10-12938-s004.xlsx]

## Sheet: Sheet1
Chart	Pairing	Sample Name	Targets	References	Mean Cp	Mean Cp	Target/Ref		Chart	Pairing	Sample Name	Targets	References	Mean Cp	Mean Cp	Target/Ref		Chart	Pairing	Sample Name	Targets	References	Mean Cp	Mean Cp	Target/Ref		BSP1	0	0 error	5	5 error	50	50 error
TRUE	D1/A1	0week	BSP1-0	ACT-0	16.506	18.5078	4.005		TRUE	D6/A6	0week	BSP1-5	ACT-5	16.5156	15.3927	0.4592		TRUE	A11/G1	0week	BSP1-50	ACT-50	17.5973	21.5134	15.1		0week	2.90733	1.03281	2.1684	1.2093	9.86267	6.03496
TRUE	D2/A2	2week	BSP1-0	ACT-0	15.527	17.2999	3.417		TRUE	D7/A7	2week	BSP1-5	ACT-5	12.6454	16.3949	13.45		TRUE	A12/H1	2week	BSP1-50	ACT-50	12.8075	17.9119	34.4		2week	1.7833	1.17346	7.67667	4.08247	39.2267	9.3035
TRUE	D3/A3	4week	BSP1-0	ACT-0	18.0404	20.3367	4.912		TRUE	D8/A8	4week	BSP1-5	ACT-5	15.648	19.5365	14.81		TRUE	D11/G4	4week	BSP1-50	ACT-50	14.7798	20.4841	52.14		4week	2.74	1.53617	14.13	2.03358	34.8733	14.3738
TRUE	D4/A4	6week	BSP1-0	ACT-0	18.7854	20.7728	3.965		TRUE	D9/A9	6week	BSP1-5	ACT-5	13.7652	18.7139	30.88		TRUE	D12/H4	6week	BSP1-50	ACT-50	16.3782	21.5995	37.31		6week	4.05967	2.30349	21.5833	6.75713	54.04	22.0328
TRUE	D5/A5	8week	BSP1-0	ACT-0	17.7418	20.256	5.713		TRUE	D10/A10	8week	BSP1-5	ACT-5	14.6376	19.3555	26.32		TRUE	G10/G7	8week	BSP1-50	ACT-50	13.6419	19.5081	58.33		8week	12.691	4.98982	29.76	2.63474	49.1233	8.47721
Chart	Pairing	Sample Name	Targets	References	Mean Cp	Mean Cp	Target/Ref		Chart	Pairing	Sample Name	Targets	References	Mean Cp	Mean Cp	Target/Ref		Chart	Pairing	Sample Name	Targets	References	Mean Cp	Mean Cp	Target/Ref
TRUE	D1/A1	0week	BSP1-0	ACT-0	16.1302	17.805	3.193		TRUE	D6/A6	0week	BSP1-5	ACT-5	16.8971	18.5173	3.074		TRUE	A11/G1	0week	BSP1-50	ACT-50	14.3283	14.8221	1.408
TRUE	D2/A2	2week	BSP1-0	ACT-0	16.4833	15.997	0.7139		TRUE	D7/A7	2week	BSP1-5	ACT-5	15.2661	17.5371	4.827		TRUE	A12/H1	2week	BSP1-50	ACT-50	12.7356	17.6919	31.04
TRUE	D3/A3	4week	BSP1-0	ACT-0	18.415	19.1742	1.693		TRUE	D8/A8	4week	BSP1-5	ACT-5	17.421	20.9283	11.37		TRUE	D11/G4	4week	BSP1-50	ACT-50	16.6491	20.7323	16.95
TRUE	D4/A4	6week	BSP1-0	ACT-0	18.2822	18.6458	1.287		TRUE	D9/A9	6week	BSP1-5	ACT-5	12.32	16.5569	18.85		TRUE	D12/H4	6week	BSP1-50	ACT-50	14.8899	21.3022	85.17
TRUE	D5/A5	8week	BSP1-0	ACT-0	13.9123	18.0075	17.09		TRUE	D10/A10	8week	BSP1-5	ACT-5	14.5334	19.5655	32.72		TRUE	G10/G7	8week	BSP1-50	ACT-50	13.2151	18.458	37.87
Chart	Pairing	Sample Name	Targets	References	Mean Cp	Mean Cp	Target/Ref		Chart	Pairing	Sample Name	Targets	References	Mean Cp	Mean Cp	Target/Ref		Chart	Pairing	Sample Name	Targets	References	Mean Cp	Mean Cp	Target/Ref
TRUE	D1/A1	0week	BSP1-0	ACT-0	16.3252	16.9328	1.524		TRUE	D6/A6	0week	BSP1-5	ACT-5	14.2809	15.8521	2.972		TRUE	A11/G1	0week	BSP1-50	ACT-50	13.1317	16.8412	13.08
TRUE	D2/A2	2week	BSP1-0	ACT-0	18.2063	18.492	1.219		TRUE	D7/A7	2week	BSP1-5	ACT-5	15.6673	17.916	4.753		TRUE	A12/H1	2week	BSP1-50	ACT-50	16.451	22.1581	52.24
TRUE	D3/A3	4week	BSP1-0	ACT-0	19.3489	20.0407	1.615		TRUE	D8/A8	4week	BSP1-5	ACT-5	13.5402	17.5593	16.21		TRUE	D11/G4	4week	BSP1-50	ACT-50	16.8911	22.0419	35.53
TRUE	D4/A4	6week	BSP1-0	ACT-0	15.0075	17.7997	6.927		TRUE	D9/A9	6week	BSP1-5	ACT-5	14.7215	18.6305	15.02		TRUE	D12/H4	6week	BSP1-50	ACT-50	17.473	22.7818	39.64
TRUE	D5/A5	8week	BSP1-0	ACT-0	17.9383	21.8713	15.27		TRUE	D10/A10	8week	BSP1-5	ACT-5	14.7952	19.7134	30.24		TRUE	G10/G7	8week	BSP1-50	ACT-50	12.3877	18.065	51.17
Chart	Pairing	Sample Name	Targets	References	Mean Cp	Mean Cp	Target/Ref		Chart	Pairing	Sample Name	Targets	References	Mean Cp	Mean Cp	Target/Ref		Chart	Pairing	Sample Name	Targets	References	Mean Cp	Mean Cp	Target/Ref		BSP2	0	0 error	5	5 error	50	50 error
TRUE	D1/A1	0week	BSP2-0	ACT-0	21.6699	17.911	0.0739		TRUE	D6/A6	0week	BSP2-5	ACT-5	16.3449	15.7405	0.6578		TRUE	A11/G1	0week	BSP2-50	ACT-50	22.6	21.7722	0.5634		0week	0.02868	0.0320295	0.611933	0.230504	1.20813	0.540457
TRUE	D2/A2	2week	BSP2-0	ACT-0	20.9335	15.7472	0.0275		TRUE	D7/A7	2week	BSP2-5	ACT-5	14.2314	16.5732	5.069		TRUE	A12/H1	2week	BSP2-50	ACT-50	18.6889	18.2863	0.7565		2week	0.0856	0.0410875	3.586	1.18294	0.820933	0.673397
TRUE	D3/A3	4week	BSP2-0	ACT-0	21.876	19.5418	0.1983		TRUE	D8/A8	4week	BSP2-5	ACT-5	17.8226	19.4831	3.161		TRUE	D11/G4	4week	BSP2-50	ACT-50	19.6475	20.8089	2.237		4week	0.1183	0.077679	3.08167	0.536115	1.77197	0.956871
TRUE	D4/A4	6week	BSP2-0	ACT-0	26.4836	21.515	0.0319		TRUE	D9/A9	6week	BSP2-5	ACT-5	16.6335	18.0393	2.65		TRUE	D12/H4	6week	BSP2-50	ACT-50	21.4808	21.6287	1.108		6week	0.0324667	0.015641	2.65	0.626253	1.37373	0.936301
TRUE	D5/A5	8week	BSP2-0	ACT-0	23.5475	19.5838	0.0641		TRUE	D10/A10	8week	BSP2-5	ACT-5	18.5694	19.7475	2.263		TRUE	G10/G7	8week	BSP2-50	ACT-50	17.4821	19.6672	4.548		8week	0.0732667	0.0328565	4.26667	1.51109	3.85733	0.562977
Chart	Pairing	Sample Name	Targets	References	Mean Cp	Mean Cp	Target/Ref		Chart	Pairing	Sample Name	Targets	References	Mean Cp	Mean Cp	Target/Ref		Chart	Pairing	Sample Name	Targets	References	Mean Cp	Mean Cp	Target/Ref
TRUE	D1/A1	0week	BSP2-0	ACT-0	27.5479	20.6434	0.00835		TRUE	D6/A6	0week	BSP2-5	ACT-5	20.6725	18.9804	0.3095		TRUE	A11/G1	0week	BSP2-50	ACT-50	15.652	16.5677	1.886
TRUE	D2/A2	2week	BSP2-0	ACT-0	19.8584	16.7432	0.1154		TRUE	D7/A7	2week	BSP2-5	ACT-5	15.885	17.6985	3.515		TRUE	A12/H1	2week	BSP2-50	ACT-50	17.7265	18.4715	1.676
TRUE	D3/A3	4week	BSP2-0	ACT-0	22.6035	19.8028	0.1435		TRUE	D8/A8	4week	BSP2-5	ACT-5	20.4772	21.7335	2.389		TRUE	D11/G4	4week	BSP2-50	ACT-50	20.5592	21.9599	2.64
TRUE	D4/A4	6week	BSP2-0	ACT-0	25.6195	19.4194	0.0136		TRUE	D9/A9	6week	BSP2-5	ACT-5	15.7808	17.5537	3.417		TRUE	D12/H4	6week	BSP2-50	ACT-50	22.1653	23.5603	2.63
TRUE	D5/A5	8week	BSP2-0	ACT-0	24.2723	19.5689	0.0384		TRUE	D10/A10	8week	BSP2-5	ACT-5	17.6043	19.8138	4.625		TRUE	G10/G7	8week	BSP2-50	ACT-50	17.9567	19.6206	3.169
Chart	Pairing	Sample Name	Targets	References	Mean Cp	Mean Cp	Target/Ref		Chart	Pairing	Sample Name	Targets	References	Mean Cp	Mean Cp	Target/Ref		Chart	Pairing	Sample Name	Targets	References	Mean Cp	Mean Cp	Target/Ref
TRUE	D1/A1	0week	BSP2-0	ACT-0	25.3973	17.3536	0.00379		TRUE	D6/A6	0week	BSP2-5	ACT-5	17.8518	17.6484	0.8685		TRUE	A11/G1	0week	BSP2-50	ACT-50	17.665	17.897	1.175
TRUE	D2/A2	2week	BSP2-0	ACT-0	20.9568	17.8228	0.1139		TRUE	D7/A7	2week	BSP2-5	ACT-5	16.721	17.8416	2.174		TRUE	A12/H1	2week	BSP2-50	ACT-50	26.6153	21.5694	0.0303
TRUE	D3/A3	4week	BSP2-0	ACT-0	25.7424	19.4879	0.0131		TRUE	D8/A8	4week	BSP2-5	ACT-5	16.6807	18.5662	3.695		TRUE	D11/G4	4week	BSP2-50	ACT-50	25.7114	24.5235	0.4389
TRUE	D4/A4	6week	BSP2-0	ACT-0	21.6051	17.3362	0.0519		TRUE	D9/A9	6week	BSP2-5	ACT-5	21.6222	22.5354	1.883		TRUE	D12/H4	6week	BSP2-50	ACT-50	26.4854	25.1014	0.3832
TRUE	D5/A5	8week	BSP2-0	ACT-0	26.6495	23.5581	0.1173		TRUE	D10/A10	8week	BSP2-5	ACT-5	17.7769	20.3404	5.912		TRUE	G10/G7	8week	BSP2-50	ACT-50	15.8011	17.7479	3.855
Chart	Pairing	Sample Name	Targets	References	Mean Cp	Mean Cp	Target/Ref		Chart	Pairing	Sample Name	Targets	References	Mean Cp	Mean Cp	Target/Ref		Chart	Pairing	Sample Name	Targets	References	Mean Cp	Mean Cp	Target/Ref		BSP3	0	0 error	5	5 error	50	50 error
TRUE	D1/A1	0week	BSP3-0	ACT-0	25.3854	17.51	0.00426		TRUE	D6/A6	0week	BSP3-5	ACT-5	25.6594	17.716	0.00406		TRUE	A11/G1	0week	BSP3-50	ACT-50	27.6507	17.6581	0.000982		0week	0.00250333	0.00133082	0.00298333	0.000781295	0.000508333	0.000340124
TRUE	D2/A2	2week	BSP3-0	ACT-0	26.3474	16.5169	0.0011		TRUE	D7/A7	2week	BSP3-5	ACT-5	27.7426	18.207	0.00135		TRUE	A12/H1	2week	BSP3-50	ACT-50	27.8815	18.4272	0.00143		2week	0.00193	0.000592002	0.00201	0.00057434	0.00505667	0.00519265
TRUE	D3/A3	4week	BSP3-0	ACT-0	25.5265	18.7639	0.00921		TRUE	D8/A8	4week	BSP3-5	ACT-5	27.2353	19.6138	0.00508		TRUE	D11/G4	4week	BSP3-50	ACT-50	29.4995	20.6227	0.00213		4week	0.0141367	0.00384743	0.0109	0.00862973	0.00522	0.00320097
TRUE	D4/A4	6week	BSP3-0	ACT-0	27.051	18.831	0.00335		TRUE	D9/A9	6week	BSP3-5	ACT-5	27.6926	19.2356	0.00285		TRUE	D12/H4	6week	BSP3-50	ACT-50	28.5764	20.4953	0.00369		6week	0.00535333	0.00150847	0.00298633	0.00171368	0.00474133	0.00356721
TRUE	D5/A5	8week	BSP3-0	ACT-0	25.6811	18.9064	0.00913		TRUE	D10/A10	8week	BSP3-5	ACT-5	26.7532	19.647	0.00726		TRUE	G10/G7	8week	BSP3-50	ACT-50	28.7336	18.8513	0.00106		8week	0.00718667	0.00226487	0.00947	0.00492874	0.000982467	0.000701312
Chart	Pairing	Sample Name	Targets	References	Mean Cp	Mean Cp	Target/Ref		Chart	Pairing	Sample Name	Targets	References	Mean Cp	Mean Cp	Target/Ref		Chart	Pairing	Sample Name	Targets	References	Mean Cp	Mean Cp	Target/Ref
TRUE	D1/A1	0week	BSP3-0	ACT-0	26.636	17.8148	0.00221		TRUE	D6/A6	0week	BSP3-5	ACT-5	26.7369	17.927	0.00223		TRUE	A11/G1	0week	BSP3-50	ACT-50	27.2442	15.7405	0.000344
TRUE	D2/A2	2week	BSP3-0	ACT-0	25.5697	16.7746	0.00225		TRUE	D7/A7	2week	BSP3-5	ACT-5	26.3181	17.8141	0.00275		TRUE	A12/H1	2week	BSP3-50	ACT-50	27.233	17.6914	0.00134
TRUE	D3/A3	4week	BSP3-0	ACT-0	25.451	19.6996	0.0186		TRUE	D8/A8	4week	BSP3-5	ACT-5	26.4971	21.0622	0.0231		TRUE	D11/G4	4week	BSP3-50	ACT-50	27.225	20.5265	0.00963
TRUE	D4/A4	6week	BSP3-0	ACT-0	25.8374	18.6769	0.00699		TRUE	D9/A9	6week	BSP3-5	ACT-5	26.6441	16.6176	0.000959		TRUE	D12/H4	6week	BSP3-50	ACT-50	28.6523	18.6783	0.000994
TRUE	D5/A5	8week	BSP3-0	ACT-0	25.6592	17.6978	0.00401		TRUE	D10/A10	8week	BSP3-5	ACT-5	28.5818	20.893	0.00485		TRUE	G10/G7	8week	BSP3-50	ACT-50	27.6954	18.5803	0.0018
Chart	Pairing	Sample Name	Targets	References	Mean Cp	Mean Cp	Target/Ref		Chart	Pairing	Sample Name	Targets	References	Mean Cp	Mean Cp	Target/Ref		Chart	Pairing	Sample Name	Targets	References	Mean Cp	Mean Cp	Target/Ref
TRUE	D1/A1	0week	BSP3-0	ACT-0	26.8841	16.9776	0.00104		TRUE	D6/A6	0week	BSP3-5	ACT-5	26.7633	18.2073	0.00266		TRUE	A11/G1	0week	BSP3-50	ACT-50	27.4278	15.1299	0.000199
TRUE	D2/A2	2week	BSP3-0	ACT-0	27.0504	18.3709	0.00244		TRUE	D7/A7	2week	BSP3-5	ACT-5	27.5082	18.4883	0.00193		TRUE	A12/H1	2week	BSP3-50	ACT-50	26.8879	20.5561	0.0124
TRUE	D3/A3	4week	BSP3-0	ACT-0	25.5523	19.4513	0.0146		TRUE	D8/A8	4week	BSP3-5	ACT-5	26.6742	18.886	0.00452		TRUE	D11/G4	4week	BSP3-50	ACT-50	28.6455	20.6437	0.0039
TRUE	D4/A4	6week	BSP3-0	ACT-0	25.774	18.3244	0.00572		TRUE	D9/A9	6week	BSP3-5	ACT-5	25.4754	17.8754	0.00515		TRUE	D12/H4	6week	BSP3-50	ACT-50	27.4668	20.7544	0.00954
TRUE	D5/A5	8week	BSP3-0	ACT-0	26.8201	19.9287	0.00842		TRUE	D10/A10	8week	BSP3-5	ACT-5	26.51	20.5668	0.0163		TRUE	G10/G7	8week	BSP3-50	ACT-50	30.4986	17.0169	8.74e-05
Chart	Pairing	Sample Name	Targets	References	Mean Cp	Mean Cp	Target/Ref		Chart	Pairing	Sample Name	Targets	References	Mean Cp	Mean Cp	Target/Ref		Chart	Pairing	Sample Name	Targets	References	Mean Cp	Mean Cp	Target/Ref		BSP4	0	0 error	5	5 error	50	50 error
TRUE	D1/A1	0week	BSP4-0	ACT-0	23.8819	17.7239	0.014		TRUE	D6/A6	0week	BSP4-5	ACT-5	21.4474	17.5579	0.0675		TRUE	A11/G1	0week	BSP4-50	ACT-50	22.8339	17.8212	0.031		0week	0.014077	0.0112551	0.0702667	0.0459696	0.0520333	0.0442561
TRUE	D2/A2	2week	BSP4-0	ACT-0	23.4095	17.4977	0.0166		TRUE	D7/A7	2week	BSP4-5	ACT-5	20.5162	17.574	0.1301		TRUE	A12/H1	2week	BSP4-50	ACT-50	23.506	17.8575	0.0199		2week	0.021	0.00553052	0.1038	0.0241919	0.0185067	0.0128487
TRUE	D3/A3	4week	BSP4-0	ACT-0	26.7713	19.6684	0.00727		TRUE	D8/A8	4week	BSP4-5	ACT-5	24.7951	20.6692	0.0573		TRUE	D11/G4	4week	BSP4-50	ACT-50	23.3768	20.9474	0.1856		4week	0.00851333	0.00212173	0.0849667	0.0409788	0.164767	0.0631827
TRUE	D4/A4	6week	BSP4-0	ACT-0	25.8624	19.7314	0.0143		TRUE	D9/A9	6week	BSP4-5	ACT-5	23.548	18.4941	0.0301		TRUE	D12/H4	6week	BSP4-50	ACT-50	25.5838	20.863	0.0379		6week	0.0282333	0.0208463	0.0391	0.0107427	0.0639333	0.0437066
TRUE	D5/A5	8week	BSP4-0	ACT-0	26.3844	19.9095	0.0112		TRUE	D10/A10	8week	BSP4-5	ACT-5	22.6783	18.6651	0.0619		TRUE	G10/G7	8week	BSP4-50	ACT-50	22.5166	19.3155	0.1087		8week	0.0217333	0.0117942	0.0694333	0.0147913	0.0897333	0.0265406
Chart	Pairing	Sample Name	Targets	References	Mean Cp	Mean Cp	Target/Ref		Chart	Pairing	Sample Name	Targets	References	Mean Cp	Mean Cp	Target/Ref		Chart	Pairing	Sample Name	Targets	References	Mean Cp	Mean Cp	Target/Ref
TRUE	D1/A1	0week	BSP4-0	ACT-0	32.2958	20.7349	0.000331		TRUE	D6/A6	0week	BSP4-5	ACT-5	21.5791	18.6124	0.1279		TRUE	A11/G1	0week	BSP4-50	ACT-50	21.8365	15.3955	0.0115
TRUE	D2/A2	2week	BSP4-0	ACT-0	22.5781	16.7527	0.0176		TRUE	D7/A7	2week	BSP4-5	ACT-5	20.8014	17.6112	0.1096		TRUE	A12/H1	2week	BSP4-50	ACT-50	22.6554	17.7563	0.0335
TRUE	D3/A3	4week	BSP4-0	ACT-0	26.2569	19.8113	0.0115		TRUE	D8/A8	4week	BSP4-5	ACT-5	25.8223	21.6301	0.0547		TRUE	D11/G4	4week	BSP4-50	ACT-50	22.8501	20.7273	0.2296
TRUE	D4/A4	6week	BSP4-0	ACT-0	25.5112	21.3967	0.0577		TRUE	D9/A9	6week	BSP4-5	ACT-5	21.7516	16.8302	0.033		TRUE	D12/H4	6week	BSP4-50	ACT-50	21.5658	18.5716	0.1255
TRUE	D5/A5	8week	BSP4-0	ACT-0	23.7082	17.723	0.0158		TRUE	D10/A10	8week	BSP4-5	ACT-5	23.5319	19.3819	0.0563		TRUE	G10/G7	8week	BSP4-50	ACT-50	21.8986	17.6398	0.0522
Chart	Pairing	Sample Name	Targets	References	Mean Cp	Mean Cp	Target/Ref		Chart	Pairing	Sample Name	Targets	References	Mean Cp	Mean Cp	Target/Ref		Chart	Pairing	Sample Name	Targets	References	Mean Cp	Mean Cp	Target/Ref
TRUE	D1/A1	0week	BSP4-0	ACT-0	21.4066	16.2455	0.0279		TRUE	D6/A6	0week	BSP4-5	ACT-5	23.7477	17.7256	0.0154		TRUE	A11/G1	0week	BSP4-50	ACT-50	17.637	14.4987	0.1136
TRUE	D2/A2	2week	BSP4-0	ACT-0	21.9228	16.8036	0.0288		TRUE	D7/A7	2week	BSP4-5	ACT-5	20.6939	16.8919	0.0717		TRUE	A12/H1	2week	BSP4-50	ACT-50	31.924	23.0449	0.00212
TRUE	D3/A3	4week	BSP4-0	ACT-0	28.401	21.1934	0.00677		TRUE	D8/A8	4week	BSP4-5	ACT-5	21.5315	18.7248	0.1429		TRUE	D11/G4	4week	BSP4-50	ACT-50	23.8355	20.1757	0.0791
TRUE	D4/A4	6week	BSP4-0	ACT-0	24.7528	18.4538	0.0127		TRUE	D9/A9	6week	BSP4-5	ACT-5	22.7334	18.529	0.0542		TRUE	D12/H4	6week	BSP4-50	ACT-50	25.76	20.6201	0.0284
TRUE	D5/A5	8week	BSP4-0	ACT-0	24.2855	19.5767	0.0382		TRUE	D10/A10	8week	BSP4-5	ACT-5	23.8415	20.3685	0.0901		TRUE	G10/G7	8week	BSP4-50	ACT-50	19.6862	16.4797	0.1083
Chart	Pairing	Sample Name	Targets	References	Mean Cp	Mean Cp	Target/Ref		Chart	Pairing	Sample Name	Targets	References	Mean Cp	Mean Cp	Target/Ref		Chart	Pairing	Sample Name	Targets	References	Mean Cp	Mean Cp	Target/Ref		BSP5	0	0 error	5	5 error	50	50 error
TRUE	D1/A1	0week	BSP5-0	ACT-0	20.8879	15.9398	0.0324		TRUE	D6/A6	0week	BSP5-5	ACT-5	19.9249	15.8283	0.0585		TRUE	A11/G1	0week	BSP5-50	ACT-50	21.7006	16.6352	0.0299		0week	0.0274667	0.0274667	0.0503	0.0134032	0.0232	0.0048463
TRUE	D2/A2	2week	BSP5-0	ACT-0	20.5955	14.8154	0.0182		TRUE	D7/A7	2week	BSP5-5	ACT-5	20.7195	15.8513	0.0342		TRUE	A12/H1	2week	BSP5-50	ACT-50	22.8185	17.7643	0.0301		2week	0.0229333	0.0229333	0.0223	0.00847624	0.0385667	0.00620555
TRUE	D3/A3	4week	BSP5-0	ACT-0	22.8654	17.6676	0.0272		TRUE	D8/A8	4week	BSP5-5	ACT-5	26.9241	20.8506	0.0148		TRUE	D11/G4	4week	BSP5-50	ACT-50	23.4576	19.4636	0.0628		4week	0.0407667	0.0407667	0.0643	0.0359884	0.0541667	0.0122802
TRUE	D4/A4	6week	BSP5-0	ACT-0	22.6298	17.8135	0.0355		TRUE	D9/A9	6week	BSP5-5	ACT-5	22.1982	17.4472	0.0371		TRUE	D12/H4	6week	BSP5-50	ACT-50	25.5868	19.4544	0.0143		6week	0.0253667	0.0253667	0.0382667	0.0169624	0.0199	0.00834745
TRUE	D5/A5	8week	BSP5-0	ACT-0	24.5545	18.4036	0.0141		TRUE	D10/A10	8week	BSP5-5	ACT-5	21.5756	17.8396	0.075		TRUE	G10/G7	8week	BSP5-50	ACT-50	23.2392	17.9641	0.0258		8week	0.0175333	0.0175333	0.0678333	0.0138223	0.0189667	0.00640538
Chart	Pairing	Sample Name	Targets	References	Mean Cp	Mean Cp	Target/Ref		Chart	Pairing	Sample Name	Targets	References	Mean Cp	Mean Cp	Target/Ref		Chart	Pairing	Sample Name	Targets	References	Mean Cp	Mean Cp	Target/Ref
TRUE	D1/A1	0week	BSP5-0	ACT-0	27.7031	21.5714	0.0143		TRUE	D6/A6	0week	BSP5-5	ACT-5	22.7899	17.796	0.0314		TRUE	A11/G1	0week	BSP5-50	ACT-50	21.3765	15.813	0.0211
TRUE	D2/A2	2week	BSP5-0	ACT-0	21.771	16.7462	0.0307		TRUE	D7/A7	2week	BSP5-5	ACT-5	24.4291	18.3802	0.0151		TRUE	A12/H1	2week	BSP5-50	ACT-50	22.4175	17.8022	0.0408
TRUE	D3/A3	4week	BSP5-0	ACT-0	22.8681	18.795	0.0594		TRUE	D8/A8	4week	BSP5-5	ACT-5	25.6064	22.274	0.0993		TRUE	D11/G4	4week	BSP5-50	ACT-50	25.7848	21.7948	0.0629
TRUE	D4/A4	6week	BSP5-0	ACT-0	28.6705	22.8899	0.0182		TRUE	D9/A9	6week	BSP5-5	ACT-5	22.8158	17.0291	0.0181		TRUE	D12/H4	6week	BSP5-50	ACT-50	26.8073	20.6181	0.0137
TRUE	D5/A5	8week	BSP5-0	ACT-0	23.6858	17.1076	0.0105		TRUE	D10/A10	8week	BSP5-5	ACT-5	23.8831	19.5184	0.0485		TRUE	G10/G7	8week	BSP5-50	ACT-50	25.51	18.9248	0.0104
Chart	Pairing	Sample Name	Targets	References	Mean Cp	Mean Cp	Target/Ref		Chart	Pairing	Sample Name	Targets	References	Mean Cp	Mean Cp	Target/Ref		Chart	Pairing	Sample Name	Targets	References	Mean Cp	Mean Cp	Target/Ref
TRUE	D1/A1	0week	BSP5-0	ACT-0	21.5874	16.7783	0.0357		TRUE	D6/A6	0week	BSP5-5	ACT-5	23.5155	19.4799	0.061		TRUE	A11/G1	0week	BSP5-50	ACT-50	19.5233	13.7764	0.0186
TRUE	D2/A2	2week	BSP5-0	ACT-0	23.3954	17.7437	0.0199		TRUE	D7/A7	2week	BSP5-5	ACT-5	26.3525	20.5268	0.0176		TRUE	A12/H1	2week	BSP5-50	ACT-50	29.0245	24.5451	0.0448
TRUE	D3/A3	4week	BSP5-0	ACT-0	29.3227	24.5128	0.0357		TRUE	D8/A8	4week	BSP5-5	ACT-5	22.533	18.8671	0.0788		TRUE	D11/G4	4week	BSP5-50	ACT-50	24.4496	19.6846	0.0368
TRUE	D4/A4	6week	BSP5-0	ACT-0	23.96	18.4775	0.0224		TRUE	D9/A9	6week	BSP5-5	ACT-5	21.8503	17.7814	0.0596		TRUE	D12/H4	6week	BSP5-50	ACT-50	28.7612	23.782	0.0317
TRUE	D5/A5	8week	BSP5-0	ACT-0	22.5995	17.4426	0.028		TRUE	D10/A10	8week	BSP5-5	ACT-5	24.0682	20.4249	0.08		TRUE	G10/G7	8week	BSP5-50	ACT-50	22.9318	17.3388	0.0207
Chart	Pairing	Sample Name	Targets	References	Mean Cp	Mean Cp	Target/Ref		Chart	Pairing	Sample Name	Targets	References	Mean Cp	Mean Cp	Target/Ref		Chart	Pairing	Sample Name	Targets	References	Mean Cp	Mean Cp	Target/Ref		BSP6	0	0 error	5	5 error	50	50 error
TRUE	D1/A1	0week	BSP6-0	ACT-0	23.9702	17.0126	0.00805		TRUE	D6/A6	0week	BSP6-5	ACT-5	22.284	16.7879	0.0222		TRUE	A11/G1	0week	BSP6-50	ACT-50	23.5269	16.7656	0.00922		0week	0.0122167	0.00421986	0.0190667	0.00471687	0.00478333	0.00321571
TRUE	D2/A2	2week	BSP6-0	ACT-0	23.4252	16.5883	0.00875		TRUE	D7/A7	2week	BSP6-5	ACT-5	23.6164	17.5676	0.0151		TRUE	A12/H1	2week	BSP6-50	ACT-50	24.5244	17.6574	0.00857		2week	0.0165167	0.00704277	0.0141333	0.00274024	0.01329	0.0072264
TRUE	D3/A3	4week	BSP6-0	ACT-0	24.2749	19.2262	0.0302		TRUE	D8/A8	4week	BSP6-5	ACT-5	24.4265	18.8088	0.0204		TRUE	D11/G4	4week	BSP6-50	ACT-50	25.7725	20.5708	0.0272		4week	0.0362667	0.0051545	0.0329333	0.0228539	0.0238	0.00742204
TRUE	D4/A4	6week	BSP6-0	ACT-0	25.214	19.5701	0.02		TRUE	D9/A9	6week	BSP6-5	ACT-5	27.0643	20.2881	0.00912		TRUE	D12/H4	6week	BSP6-50	ACT-50	26.69	19.9853	0.00959		6week	0.0329667	0.0147495	0.0138067	0.00714311	0.0093	0.00518473
TRUE	D5/A5	8week	BSP6-0	ACT-0	24.4467	19.8605	0.0416		TRUE	D10/A10	8week	BSP6-5	ACT-5	24.407	19.4377	0.0319		TRUE	G10/G7	8week	BSP6-50	ACT-50	25.8144	18.6004	0.00674		8week	0.0267	0.0107725	0.02617	0.0132846	0.00341667	0.00238728
Chart	Pairing	Sample Name	Targets	References	Mean Cp	Mean Cp	Target/Ref		Chart	Pairing	Sample Name	Targets	References	Mean Cp	Mean Cp	Target/Ref		Chart	Pairing	Sample Name	Targets	References	Mean Cp	Mean Cp	Target/Ref
TRUE	D1/A1	0week	BSP6-0	ACT-0	23.8091	17.2497	0.0106		TRUE	D6/A6	0week	BSP6-5	ACT-5	24.7967	18.4612	0.0124		TRUE	A11/G1	0week	BSP6-50	ACT-50	24.7961	16.6071	0.00343
TRUE	D2/A2	2week	BSP6-0	ACT-0	21.9121	16.6364	0.0258		TRUE	D7/A7	2week	BSP6-5	ACT-5	24.4994	18.6133	0.0169		TRUE	A12/H1	2week	BSP6-50	ACT-50	24.839	17.8365	0.0078
TRUE	D3/A3	4week	BSP6-0	ACT-0	24.6213	19.8165	0.0358		TRUE	D8/A8	4week	BSP6-5	ACT-5	25.7101	21.7658	0.065		TRUE	D11/G4	4week	BSP6-50	ACT-50	25.7477	20.7233	0.0307
TRUE	D4/A4	6week	BSP6-0	ACT-0	23.6605	18.3564	0.0253		TRUE	D9/A9	6week	BSP6-5	ACT-5	24.4877	17.5929	0.0084		TRUE	D12/H4	6week	BSP6-50	ACT-50	27.5505	19.0765	0.00281
TRUE	D5/A5	8week	BSP6-0	ACT-0	22.664	16.745	0.0165		TRUE	D10/A10	8week	BSP6-5	ACT-5	30.7269	23.7267	0.00781		TRUE	G10/G7	8week	BSP6-50	ACT-50	27.4268	18.645	0.00227
Chart	Pairing	Sample Name	Targets	References	Mean Cp	Mean Cp	Target/Ref		Chart	Pairing	Sample Name	Targets	References	Mean Cp	Mean Cp	Target/Ref		Chart	Pairing	Sample Name	Targets	References	Mean Cp	Mean Cp	Target/Ref
TRUE	D1/A1	0week	BSP6-0	ACT-0	23.3587	17.5658	0.018		TRUE	D6/A6	0week	BSP6-5	ACT-5	23.8507	18.3848	0.0226		TRUE	A11/G1	0week	BSP6-50	ACT-50	25.6301	16.4296	0.0017
TRUE	D2/A2	2week	BSP6-0	ACT-0	24.7114	18.6549	0.015		TRUE	D7/A7	2week	BSP6-5	ACT-5	25.6315	19.0424	0.0104		TRUE	A12/H1	2week	BSP6-50	ACT-50	27.0421	21.6281	0.0235
TRUE	D3/A3	4week	BSP6-0	ACT-0	24.6607	20.1139	0.0428		TRUE	D8/A8	4week	BSP6-5	ACT-5	25.263	19.0406	0.0134		TRUE	D11/G4	4week	BSP6-50	ACT-50	27.8863	21.6747	0.0135
TRUE	D4/A4	6week	BSP6-0	ACT-0	23.0231	18.8003	0.0536		TRUE	D9/A9	6week	BSP6-5	ACT-5	23.7938	18.4085	0.0239		TRUE	D12/H4	6week	BSP6-50	ACT-50	27.5822	21.5696	0.0155
TRUE	D5/A5	8week	BSP6-0	ACT-0	26.0482	20.5445	0.022		TRUE	D10/A10	8week	BSP6-5	ACT-5	25.5131	20.8255	0.0388		TRUE	G10/G7	8week	BSP6-50	ACT-50	27.5339	17.8726	0.00124
