# Supplementary material for: Characterization of the bark storage protein gene (JcBSP) family in the perennial woody plant Jatropha curcas and the function of JcBSP1 in Arabidopsis thaliana
Source: PeerJ. 2022 Feb 8;10:e12938. doi: 10.7717/peerj.12938 (PMC8833228; doi:10.7717/peerj.12938)
Supplement: Supplemental Information 5 [file peerj-10-12938-s005.xlsx]

## Sheet: Sheet1
Chart	Pairing	Sample Name	Targets	References	Mean Cp	Mean Cp	Target/Ref		Chart	Pairing	Sample Name	Targets	References	Mean Cp	Mean Cp	Target/Ref		Chart	Pairing	Sample Name	Targets	References	Mean Cp	Mean Cp	Target/Ref		BSP1
TRUE	D1/A1	R	BSP1	ACT	18.3111	22.2842	15.7		TRUE	D1/A1	R	BSP1	ACT	17.5486	21.5383	15.89		TRUE	D1/A1	R	BSP1	ACT	18.0296	22.4383	21.24		17.61	2.56797
TRUE	D2/A2	S	BSP1	ACT	15.6458	20.8918	37.95		TRUE	D2/A2	S	BSP1	ACT	14.8161	20.4829	50.8		TRUE	D2/A2	S	BSP1	ACT	15.557	21.0933	46.41		45.0533	5.33298
TRUE	D3/A3	SA	BSP1	ACT	12.5731	19.8215	152.1		TRUE	D3/A3	SA	BSP1	ACT	11.8462	18.7422	119.1		TRUE	D3/A3	SA	BSP1	ACT	12.4784	19.8969	171.1		147.433	21.4838
TRUE	D4/A4	YL	BSP1	ACT	14.8363	19.606	27.28		TRUE	D4/A4	YL	BSP1	ACT	14.4369	19.8855	43.67		TRUE	D4/A4	YL	BSP1	ACT	14.7438	19.7055	31.16		34.0367	6.99354
TRUE	D5/A5	ML	BSP1	ACT	19.7178	22.8536	8.789		TRUE	D5/A5	ML	BSP1	ACT	19.3759	22.4165	8.228		TRUE	D5/A5	ML	BSP1	ACT	19.6436	22.9433	9.847		8.95467	0.671255
TRUE	D6/A6	MF	BSP1	ACT	26.3418	22.7288	0.0817		TRUE	D6/A6	MF	BSP1	ACT	25.5339	22.0567	0.0898		TRUE	D6/A6	MF	BSP1	ACT	25.9516	22.8429	0.1159		0.0958	0.0145925
TRUE	D7/A7	FF	BSP1	ACT	17.3462	22.4941	35.46		TRUE	D7/A7	FF	BSP1	ACT	16.6758	21.9641	39.08		TRUE	D7/A7	FF	BSP1	ACT	17.1385	22.5773	43.38		39.3067	3.2373
TRUE	D8/A8	Fr	BSP1	ACT	22.5597	21.9188	0.6413		TRUE	D8/A8	Fr	BSP1	ACT	21.809	21.4767	0.7943		TRUE	D8/A8	Fr	BSP1	ACT	22.4665	22.2224	0.8444		0.76	0.0863897
TRUE	D9/A9	Se	BSP1	ACT	21.8456	14.9403	0.00834		TRUE	D9/A9	Se	BSP1	ACT	21.4863	14.5722	0.00829		TRUE	D9/A9	Se	BSP1	ACT	21.7676	15.0935	0.00979		0.00880667	0.000695621
Chart	Pairing	Sample Name	Targets	References	Mean Cp	Mean Cp	Target/Ref		Chart	Pairing	Sample Name	Targets	References	Mean Cp	Mean Cp	Target/Ref		Chart	Pairing	Sample Name	Targets	References	Mean Cp	Mean Cp	Target/Ref		BSP2
TRUE	A10/A1	R	BSP2	ACT	27.7334	20.2138	0.00545		TRUE	A10/A1	R	BSP2	ACT	28.9527	22.4383	0.0109		TRUE	A10/A1	R	BSP2	ACT	29.6432	22.4383	0.00678		0.00771	0.0023201
TRUE	B10/A2	S	BSP2	ACT	23.8086	19.688	0.0575		TRUE	B10/A2	S	BSP2	ACT	24.2394	21.0933	0.113		TRUE	B10/A2	S	BSP2	ACT	24.7941	21.0933	0.0769		0.0824667	0.0229971
TRUE	C10/A3	SA	BSP2	ACT	17.6349	18.6743	2.055		TRUE	C10/A3	SA	BSP2	ACT	17.8695	19.8969	4.077		TRUE	C10/A3	SA	BSP2	ACT	18.4697	19.8969	2.689		2.94033	0.844392
TRUE	D10/A4	YL	BSP2	ACT	21.7214	18.7805	0.1302		TRUE	D10/A4	YL	BSP2	ACT	22.2945	19.7055	0.1662		TRUE	D10/A4	YL	BSP2	ACT	22.8258	19.7055	0.115		0.137133	0.0214696
TRUE	E10/A5	ML	BSP2	ACT	27.5119	21.7996	0.0191		TRUE	E10/A5	ML	BSP2	ACT	27.7738	22.9433	0.0351		TRUE	E10/A5	ML	BSP2	ACT	28.1962	22.9433	0.0262		0.0268	0.00654574
TRUE	F10/A6	MF	BSP2	ACT	26.79	20.8305	0.0161		TRUE	F10/A6	MF	BSP2	ACT	27.1548	22.8429	0.0504		TRUE	F10/A6	MF	BSP2	ACT	27.5324	22.8429	0.0388		0.0351	0.0142452
TRUE	G10/A7	FF	BSP2	ACT	20.5912	21.6076	2.023		TRUE	G10/A7	FF	BSP2	ACT	20.9447	22.5773	3.101		TRUE	G10/A7	FF	BSP2	ACT	21.4193	22.5773	2.231		2.45167	0.466934
TRUE	H10/A8	Fr	BSP2	ACT	26.4952	20.7497	0.0186		TRUE	H10/A8	Fr	BSP2	ACT	26.7945	22.2224	0.042		TRUE	H10/A8	Fr	BSP2	ACT	27.5166	22.2224	0.0255		0.0287	0.00981733
TRUE	H7/A9	Se	BSP2	ACT	29.169	13.8314	2.41e-05		TRUE	H7/A9	Se	BSP2	ACT	29.5702	15.0935	4.39e-05		TRUE	H7/A9	Se	BSP2	ACT	30.7675	15.0935	1.91e-05		2.90333e-05	1.07087e-05
Chart	Pairing	Sample Name	Targets	References	Mean Cp	Mean Cp	Target/Ref		Chart	Pairing	Sample Name	Targets	References	Mean Cp	Mean Cp	Target/Ref		Chart	Pairing	Sample Name	Targets	References	Mean Cp	Mean Cp	Target/Ref		BSP3
TRUE	D1/A1	R	BSP3	ACT	22.4579	19.7562	0.1537		TRUE	D1/A1	R	BSP3	ACT	22.5381	20.132	0.1887		TRUE	D1/A1	R	BSP3	ACT	22.7673	19.5834	0.11		0.1508	0.0321945
TRUE	D2/A2	S	BSP3	ACT	18.8475	17.5046	0.3942		TRUE	D2/A2	S	BSP3	ACT	18.9639	17.7128	0.4201		TRUE	D2/A2	S	BSP3	ACT	19.4524	17.216	0.2122		0.342167	0.0925066
TRUE	D3/A3	SA	BSP3	ACT	18.5595	17.5124	0.4839		TRUE	D3/A3	SA	BSP3	ACT	18.6745	17.6025	0.4756		TRUE	D3/A3	SA	BSP3	ACT	18.8816	17.0468	0.2803		0.413267	0.0940827
TRUE	D4/A4	YL	BSP3	ACT	21.8896	17.6419	0.0526		TRUE	D4/A4	YL	BSP3	ACT	22.4871	17.7264	0.0369		TRUE	D4/A4	YL	BSP3	ACT	22.6689	16.7844	0.0169		0.0354667	0.0146097
TRUE	D5/A5	ML	BSP3	ACT	24.1931	18.7672	0.0233		TRUE	D5/A5	ML	BSP3	ACT	24.4224	19.1488	0.0259		TRUE	D5/A5	ML	BSP3	ACT	24.5625	18.6276	0.0163		0.0218333	0.00405408
TRUE	D6/A6	MF	BSP3	ACT	22.6463	20.6056	0.243		TRUE	D6/A6	MF	BSP3	ACT	23.008	20.9331	0.2374		TRUE	D6/A6	MF	BSP3	ACT	23.5913	19.8409	0.0743		0.1849	0.0782394
TRUE	D7/A7	FF	BSP3	ACT	23.7537	18.5456	0.0271		TRUE	D7/A7	FF	BSP3	ACT	23.8767	18.7368	0.0284		TRUE	D7/A7	FF	BSP3	ACT	24.42	18.4227	0.0157		0.0237333	0.00570516
TRUE	D8/A8	Fr	BSP3	ACT	27.9935	25.6752	0.2005		TRUE	D8/A8	Fr	BSP3	ACT	28.1173	25.8829	0.2125		TRUE	D8/A8	Fr	BSP3	ACT	27.7807	25.5392	0.2115		0.208167	0.0054365
TRUE	D9/A9	Se	BSP3	ACT	24.6333	18.8737	0.0185		TRUE	D9/A9	Se	BSP3	ACT	25.1097	19.5011	0.0205		TRUE	D9/A9	Se	BSP3	ACT	25.6304	18.7138	0.00828		0.01576	0.00535181
Chart	Pairing	Sample Name	Targets	References	Mean Cp	Mean Cp	Target/Ref		Chart	Pairing	Sample Name	Targets	References	Mean Cp	Mean Cp	Target/Ref		Chart	Pairing	Sample Name	Targets	References	Mean Cp	Mean Cp	Target/Ref		BSP4
TRUE	D1/A1	R	BSP4	ACT	32.4641	26.9979	0.0226		TRUE	D1/A1	R	BSP4	ACT	21.5939	17.772	0.0707		TRUE	D1/A1	R	BSP4	ACT	33.2056	27.0905	0.0144		0.0359	0.024834
TRUE	D2/A2	S	BSP4	ACT	28.121	27.262	0.5514		TRUE	D2/A2	S	BSP4	ACT	17.5626	14.8285	0.1503		TRUE	D2/A2	S	BSP4	ACT	28.1115	27.3342	0.5835		0.4284	0.197083
TRUE	D3/A3	SA	BSP4	ACT	22.8022	23.3588	1.471		TRUE	D3/A3	SA	BSP4	ACT	15.4264	14.4838	0.5203		TRUE	D3/A3	SA	BSP4	ACT	23.8341	23.7896	0.9696		0.986967	0.388316
TRUE	D4/A4	YL	BSP4	ACT	25.8589	23.0264	0.1404		TRUE	D4/A4	YL	BSP4	ACT	17.2597	15.3623	0.2684		TRUE	D4/A4	YL	BSP4	ACT	26.696	22.3464	0.049		0.1526	0.0899841
TRUE	D5/A5	ML	BSP4	ACT	18.7984	18.4138	0.7659		TRUE	D5/A5	ML	BSP4	ACT	18.3225	17.0511	0.4143		TRUE	D5/A5	ML	BSP4	ACT	19.6821	18.496	0.4395		0.5399	0.160137
TRUE	D6/A6	MF	BSP4	ACT	15.3789	15.7456	1.289		TRUE	D6/A6	MF	BSP4	ACT	19.3907	17.4537	0.2612		TRUE	D6/A6	MF	BSP4	ACT	16.6589	16.5609	0.9344		0.8282	0.426264
TRUE	D7/A7	FF	BSP4	ACT	21.3278	24.2248	7.449		TRUE	D7/A7	FF	BSP4	ACT	13.4814	15.6329	4.443		TRUE	D7/A7	FF	BSP4	ACT	21.6051	24.4938	7.406		6.43267	1.40702
TRUE	D8/A8	Fr	BSP4	ACT	28.0687	28.2298	1.118		TRUE	D8/A8	Fr	BSP4	ACT	19.8594	14.513	0.0246		TRUE	D8/A8	Fr	BSP4	ACT	28.7511	28.3816	0.774		0.638867	0.456491
TRUE	D9/A9	Se	BSP4	ACT	31.9341	17.2592	3.82e-05		TRUE	D9/A9	Se	BSP4	ACT	19.9709	14.7537	0.0269		TRUE	D9/A9	Se	BSP4	ACT	32.801	17.7058	2.86e-05		0.00898893	0.012665
Chart	Pairing	Sample Name	Targets	References	Mean Cp	Mean Cp	Target/Ref		Chart	Pairing	Sample Name	Targets	References	Mean Cp	Mean Cp	Target/Ref		Chart	Pairing	Sample Name	Targets	References	Mean Cp	Mean Cp	Target/Ref		BSP5
TRUE	A10/A1	R	BSP5	ACT	22.5318	17.6609	0.0342		TRUE	A10/A1	R	BSP5	ACT	28.1243	22.8262	0.0254		TRUE	A10/A1	R	BSP5	ACT	27.4366	22.6042	0.0351		0.0315667	0.00437594
TRUE	B10/A2	S	BSP5	ACT	16.3523	14.7482	0.3289		TRUE	B10/A2	S	BSP5	ACT	24.6339	22.4366	0.2181		TRUE	B10/A2	S	BSP5	ACT	24.245	22.117	0.2288		0.2586	0.0499012
TRUE	C10/A3	SA	BSP5	ACT	16.853	13.8613	0.1257		TRUE	C10/A3	SA	BSP5	ACT	23.1314	18.1649	0.032		TRUE	C10/A3	SA	BSP5	ACT	22.477	17.7989	0.0391		0.0656	0.0425959
TRUE	D10/A4	YL	BSP5	ACT	19.5749	15.2054	0.0484		TRUE	D10/A4	YL	BSP5	ACT	24.1546	21.2933	0.1376		TRUE	D10/A4	YL	BSP5	ACT	23.5034	20.7821	0.1516		0.112533	0.0457079
TRUE	E10/A5	ML	BSP5	ACT	21.1645	16.842	0.05		TRUE	E10/A5	ML	BSP5	ACT	27.0946	23.1835	0.0665		TRUE	E10/A5	ML	BSP5	ACT	26.7751	22.802	0.0637		0.0600667	0.00720941
TRUE	F10/A6	MF	BSP5	ACT	22.6313	17.1442	0.0223		TRUE	F10/A6	MF	BSP5	ACT	32.8751	24.1593	0.00238		TRUE	F10/A6	MF	BSP5	ACT	32.427	23.7866	0.00251		0.00906333	0.00935989
TRUE	G10/A7	FF	BSP5	ACT	23.7729	15.5514	0.00335		TRUE	G10/A7	FF	BSP5	ACT	26.6001	19.8566	0.00933		TRUE	G10/A7	FF	BSP5	ACT	26.0668	19.6044	0.0113		0.00799333	0.0033804
TRUE	H10/A8	Fr	BSP5	ACT	19.7851	14.4532	0.0248		TRUE	H10/A8	Fr	BSP5	ACT	23.2889	16.8718	0.0117		TRUE	H10/A8	Fr	BSP5	ACT	22.6084	16.6211	0.0158		0.0174333	0.00547134
TRUE	H7/A9	Se	BSP5	ACT	20.6855	14.6552	0.0153		TRUE	H7/A9	Se	BSP5	ACT	30.3618	18.9441	0.000366		TRUE	H7/A9	Se	BSP5	ACT	29.434	18.7589	0.000612		0.005426	0.00698269
Chart	Pairing	Sample Name	Targets	References	Mean Cp	Mean Cp	Target/Ref		Chart	Pairing	Sample Name	Targets	References	Mean Cp	Mean Cp	Target/Ref		Chart	Pairing	Sample Name	Targets	References	Mean Cp	Mean Cp	Target/Ref		BSP6
TRUE	A10/A1	R	BSP6	ACT	28.7503	19.7562	0.00196		TRUE	A10/A1	R	BSP6	ACT	28.7535	20.132	0.00254		TRUE	A10/A1	R	BSP6	ACT	28.7511	20.3241	0.00291		0.00247	0.000390982
TRUE	B10/A2	S	BSP6	ACT	24.8341	17.5046	0.00622		TRUE	B10/A2	S	BSP6	ACT	24.8815	17.7128	0.00695		TRUE	B10/A2	S	BSP6	ACT	24.835	17.7772	0.00751		0.00689333	0.000528162
TRUE	C10/A3	SA	BSP6	ACT	24.8188	17.5124	0.00632		TRUE	C10/A3	SA	BSP6	ACT	24.822	17.6025	0.00671		TRUE	C10/A3	SA	BSP6	ACT	24.8196	17.6618	0.007		0.00667667	0.000278608
TRUE	D10/A4	YL	BSP6	ACT	27.501	17.6419	0.00108		TRUE	D10/A4	YL	BSP6	ACT	27.5052	17.7264	0.00114		TRUE	D10/A4	YL	BSP6	ACT	27.5021	17.5649	0.00102		0.00108	4.89898e-05
TRUE	E10/A5	ML	BSP6	ACT	29.3141	18.7672	0.000668		TRUE	E10/A5	ML	BSP6	ACT	29.3183	19.1488	0.000868		TRUE	E10/A5	ML	BSP6	ACT	29.3152	19.3831	0.00102		0.000852	0.000144148
TRUE	F10/A6	MF	BSP6	ACT	26.735	20.6056	0.0143		TRUE	F10/A6	MF	BSP6	ACT	26.7396	20.9331	0.0179		TRUE	F10/A6	MF	BSP6	ACT	26.7362	20.8345	0.0167		0.0163	0.00149666
TRUE	G10/A7	FF	BSP6	ACT	30.4246	18.5456	0.000266		TRUE	G10/A7	FF	BSP6	ACT	30.2114	18.7368	0.000351		TRUE	G10/A7	FF	BSP6	ACT	30.4253	18.796	0.000316		0.000311	3.48807e-05
TRUE	H10/A8	Fr	BSP6	ACT	37.8332	25.6752	0.000219		TRUE	H10/A8	Fr	BSP6	ACT	37.8363	25.8829	0.000252		TRUE	H10/A8	Fr	BSP6	ACT	37.834	25.9942	0.000273		0.000248	2.22261e-05
TRUE	H7/A9	Se	BSP6	ACT	32.2518	18.8737	9.39e-05		TRUE	H7/A9	Se	BSP6	ACT	32.2558	19.5011	0.000145		TRUE	H7/A9	Se	BSP6	ACT	32.2529	19.5529	0.00015		0.000129633	2.53496e-05
