# Supplementary material for: Characterization of the bark storage protein gene (JcBSP) family in the perennial woody plant Jatropha curcas and the function of JcBSP1 in Arabidopsis thaliana
Source: PeerJ. 2022 Feb 8;10:e12938. doi: 10.7717/peerj.12938 (PMC8833228; doi:10.7717/peerj.12938)
Supplement: Supplemental Information 6 [file peerj-10-12938-s006.xlsx]

## Sheet: Sheet1
	B+P-1	X+P-1	B+P-2	X+P-2	B+P-3	X+P-3		AVE	B+P	X+P	error	B+P	X+P
Oct.	10.35	12.096	10.512	10.224	10.62	9.774			10.494	10.698		0.110959	1.00546
Dec.	13.338	16.83	11.358	16.236	12.222	16.038			12.306	16.368		0.810511	0.336535
Mar.	5.436	9.81	5.472	5.886	10.296	7.704			7.068	7.8		2.28259	1.6034
Apr.	7.992	8.55	5.868	6.192	5.49	8.982			6.45	7.908		1.10122	1.22615
Jun.	6.21	4.068	4.986	3.852	7.326	6.912			6.174	4.944		0.95564	1.39438
Aug.	6.012	4.716	5.058	5.634	5.418	7.074			5.496	5.808		0.393355	0.97048
