# Supplementary material for: Characterization of the bark storage protein gene (JcBSP) family in the perennial woody plant Jatropha curcas and the function of JcBSP1 in Arabidopsis thaliana
Source: PeerJ. 2022 Feb 8;10:e12938. doi: 10.7717/peerj.12938 (PMC8833228; doi:10.7717/peerj.12938)
Supplement: Supplemental Information 7 [file peerj-10-12938-s007.xlsx]

## Sheet: Sheet1
Leaf length(cm)	Leaf width(cm)			Leaf length(cm)	Leaf width(cm)		AV	Leaf length(cm)	Leaf width(cm)		SD	Leaf length(cm)	Leaf width(cm)
4.4	1.7	L10-1		4.15	1.6	L10-1		3.79062	1.4375	L10		0.223934	0.117925	L10
4.1	1.6	L10-1		3.825	1.375	L10-2		3.4125	1.35938	L4		0.206534	0.10073	L4
3.9	1.5	L10-1		3.75	1.6	L10-3		2.5	0.98125	WT		0.226729	0.144563	WT
4.2	1.6	L10-1		3.475	1.525	L10-4
4.3	1.5	L10-2		3.9	1.375	L10-5
4	1.5	L10-2		3.525	1.25	L10-6
3.4	1.3	L10-2		3.65	1.35	L10-7
3.6	1.2	L10-2		4.05	1.425	L10-8
4.1	1.6	L10-3
3.6	1.6	L10-3	①	WT	2.575	2.35	2.525	2.5	2.675	2.325	2.925	2.125		②	WT	2.575	2.35	2.525	2.5	2.675	2.325	2.925	2.125
3.4	1.6	L10-3	Leaf length(cm)	L4	3.425	3.275	3.05	3.225	3.75	3.55	3.475	3.55		Leaf length(cm)	L10	4.15	3.825	3.75	3.475	3.9	3.525	3.65	4.05
3.9	1.6	L10-3
3.6	1.8	L10-4		Anova: Single Factor											Anova: Single Factor
3.9	1.7	L10-4
3.2	1.5	L10-4		SUMMARY											SUMMARY
3.2	1.1	L10-4		Groups	Count	Sum	Average	Variance							Groups	Count	Sum	Average	Variance
3.4	1.4	L10-5		Row 1	8	20	2.5	0.05875							Row 1	8	20	2.5	0.05875
4.1	1.5	L10-5		Row 2	8	27.3	3.4125	0.04875							Row 2	8	30.325	3.79062	0.0573103
4.1	1.3	L10-5
4	1.3	L10-5
4.2	1.5	L10-6		ANOVA											ANOVA
3.5	1.1	L10-6		Source of Variation	SS	df	MS	F	P-value	F crit					Source of Variation	SS	df	MS	F	P-value	F crit
3.2	1.2	L10-6		Between Groups	3.33062	1	3.33062	61.9651	1.65197e-06	4.60011					Between Groups	6.66285	1	6.66285	114.817	3.94399e-08	4.60011
3.2	1.2	L10-6		Within Groups	0.7525	14	0.05375								Within Groups	0.812422	14	0.0580301
3.7	1.3	L10-7
3.5	1.3	L10-7		Total	4.08312	15									Total	7.47527	15
3.7	1.4	L10-7
3.7	1.4	L10-7
3.9	1.6	L10-8					③	WT	1.175	1.1	1.125	1	0.95	0.875	0.925	0.7		④	WT	1.175	1.1	1.125	1	0.95	0.875	0.925	0.7
4.1	1.5	L10-8					Leaf width(cm)	L4	1.45	1.275	1.2	1.25	1.5	1.45	1.375	1.375		Leaf width(cm)	L10	1.6	1.375	1.6	1.525	1.375	1.25	1.35	1.425
3.4	1.3	L10-8
4.8	1.3	L10-8		Leaf length(cm)	Leaf width(cm)			Anova: Single Factor											Anova: Single Factor
3.5	1.9	L4-1		3.425	1.45	L4-1
3.5	1.3	L4-1		3.275	1.275	L4-2		SUMMARY											SUMMARY
3.7	1.4	L4-1		3.05	1.2	L4-3		Groups	Count	Sum	Average	Variance							Groups	Count	Sum	Average	Variance
3	1.2	L4-1		3.225	1.25	L4-4		Row 1	8	7.85	0.98125	0.0238839							Row 1	8	7.85	0.98125	0.0238839
3.2	1.3	L4-2		3.75	1.5	L4-5		Row 2	8	10.875	1.35938	0.011596							Row 2	8	11.5	1.4375	0.0158929
3.2	1.3	L4-2		3.55	1.45	L4-6
3.1	1.2	L4-2		3.475	1.375	L4-7
3.6	1.3	L4-2		3.55	1.375	L4-8		ANOVA											ANOVA
3.4	1.3	L4-3						Source of Variation	SS	df	MS	F	P-value	F crit					Source of Variation	SS	df	MS	F	P-value	F crit
3.1	1.2	L4-3						Between Groups	0.571914	1	0.571914	32.2388	5.70344e-05	4.60011					Between Groups	0.832656	1	0.832656	41.8664	1.47202e-05	4.60011
3.1	1.1	L4-3						Within Groups	0.248359	14	0.01774								Within Groups	0.278438	14	0.0198884
2.6	1.2	L4-3
3.4	1.4	L4-4						Total	0.820273	15									Total	1.11109	15
3.3	1.2	L4-4
3	1.1	L4-4
3.2	1.3	L4-4
3.7	1.6	L4-5
3.4	1.4	L4-5
3.9	1.6	L4-5
4	1.4	L4-5
3.7	1.5	L4-6
3.6	1.4	L4-6
3.4	1.5	L4-6
3.5	1.4	L4-6
3.6	1.4	L4-7
3.3	1.4	L4-7
3.6	1.5	L4-7
3.4	1.2	L4-7
3.5	1.4	L4-8
3.5	1.4	L4-8
3.6	1.3	L4-8
3.6	1.4	L4-8		Leaf length(cm)	Leaf width(cm)
2.9	1.4	WT-1		2.575	1.175	WT-1
1.9	0.9	WT-1		2.35	1.1	WT-2
2.7	1.2	WT-1		2.525	1.125	WT-3
2.8	1.2	WT-1		2.5	1	WT-4
2.1	1	WT-2		2.675	0.95	WT-5
2.7	1.1	WT-2		2.325	0.875	WT-6
2.2	1.2	WT-2		2.925	0.925	WT-7
2.4	1.1	WT-2		2.125	0.7	WT-8
2.7	1.2	WT-3
2.2	1.1	WT-3
2.9	1.1	WT-3
2.3	1.1	WT-3
2.5	1	WT-4
2	0.8	WT-4
2.8	1.2	WT-4
2.7	1	WT-4
3.1	1.1	WT-5
2.7	1.1	WT-5
2.8	1	WT-5
2.1	0.6	WT-5
2.4	0.9	WT-6
2.4	0.9	WT-6
2.4	0.9	WT-6
2.1	0.8	WT-6
3.2	1.1	WT-7
2.9	1	WT-7
3.1	0.9	WT-7
2.5	0.7	WT-7
2.2	0.8	WT-8
2.4	0.7	WT-8
2.1	0.8	WT-8
1.8	0.5	WT-8
