# Supplementary material for: Characterization of the bark storage protein gene (JcBSP) family in the perennial woody plant Jatropha curcas and the function of JcBSP1 in Arabidopsis thaliana
Source: PeerJ. 2022 Feb 8;10:e12938. doi: 10.7717/peerj.12938 (PMC8833228; doi:10.7717/peerj.12938)
Supplement: Supplemental Information 8 [file peerj-10-12938-s008.xlsx]

## Sheet: Sheet1
	①	②	③
WT	0.0015	0.0016	0.0015
L4	0.0019	0.0018	0.0018
L10	0.0019	0.0019	0.0018
	①	②	③
WT	1.5	1.6	1.5		1.53333	0.0471405
L4	1.9	1.8	1.8		1.83333	0.0471405
L10	1.9	1.9	1.8		1.86667	0.0471405
①	WT	0.0015	0.0016	0.0015							②	WT	0.0015	0.0016	0.0015
	L4	0.0019	0.0018	0.0018								L10	0.0019	0.0019	0.0018
Anova: Single Factor											Anova: Single Factor
SUMMARY											SUMMARY
Groups	Count	Sum	Average	Variance							Groups	Count	Sum	Average	Variance
Row 1	3	0.0046	0.00153333	3.33333e-09							Row 1	3	0.0046	0.00153333	3.33333e-09
Row 2	3	0.0055	0.00183333	3.33333e-09							Row 2	3	0.0056	0.00186667	3.33333e-09
ANOVA											ANOVA
Source of Variation	SS	df	MS	F	P-value	F crit					Source of Variation	SS	df	MS	F	P-value	F crit
Between Groups	1.35e-07	1	1.35e-07	40.5	0.00312559	7.70865					Between Groups	1.66667e-07	1	1.66667e-07	50	0.00211065	7.70865
Within Groups	1.33333e-08	4	3.33333e-09								Within Groups	1.33333e-08	4	3.33333e-09
Total	1.48333e-07	5									Total	1.8e-07	5
