# Supplementary material for: Characterization of the bark storage protein gene (JcBSP) family in the perennial woody plant Jatropha curcas and the function of JcBSP1 in Arabidopsis thaliana
Source: PeerJ. 2022 Feb 8;10:e12938. doi: 10.7717/peerj.12938 (PMC8833228; doi:10.7717/peerj.12938)
Supplement: Supplemental Information 9 [file peerj-10-12938-s009.xlsx]

## Sheet: Sheet1
WT	0.0175	0.0159	0.0226	0.0142	0.013	0.0268	WT	0.0183333	0.00486541
L4	0.0302	0.0207	0.026	0.0368	0.0209	0.0229	L4	0.02625	0.00573897
L10	0.0563	0.064	0.0325	0.0626	0.0252	0.0514	L10	0.0486667	0.0147594
①	WT	0.0175	0.0159	0.0226	0.0142	0.013	0.0268
	L4	0.0302	0.0207	0.026	0.0368	0.0209	0.0229
	Anova: Single Factor
	SUMMARY
	Groups	Count	Sum	Average	Variance
	Row 1	6	0.11	0.0183333	2.84067e-05
	Row 2	6	0.1575	0.02625	3.9523e-05
	ANOVA
	Source of Variation	SS	df	MS	F	P-value	F crit
	Between Groups	0.000188021	1	0.000188021	5.53575	0.0404458	4.9646
	Within Groups	0.000339648	10	3.39648e-05
	Total	0.000527669	11
②	WT	0.0175	0.0159	0.0226	0.0142	0.013	0.0268
	L10	0.0563	0.064	0.0325	0.0626	0.0252	0.0514
	Anova: Single Factor
	SUMMARY
	Groups	Count	Sum	Average	Variance
	Row 1	6	0.11	0.0183333	2.84067e-05
	Row 2	6	0.292	0.0486667	0.000261407
	ANOVA
	Source of Variation	SS	df	MS	F	P-value	F crit
	Between Groups	0.00276033	1	0.00276033	19.049	0.00141114	4.9646
	Within Groups	0.00144907	10	0.000144907
	Total	0.0042094	11
